# Supplementary material for: Development of Scaffolds with Adjusted Stiffness for Mimicking Disease-Related Alterations of Liver Rigidity
Source: MDPI journal article supplement (doi:10.3390/jfb11010017), 2020-03-14
Supplement: s1 [file s1]

# Supplementary Materials: Development of Scaffolds with Adjusted Stiffness for Mimicking Disease-Related Alterations of Liver Rigidity

Marc Ruoff <sup>1,\*</sup>, Silas Rebholz <sup>1</sup>, Marina Weimer <sup>1,2</sup>, Carl Grom-Baumgarten <sup>1</sup>, Kiriaki Athanasopulu <sup>2</sup>, Ralf Kemkemer <sup>2</sup>, Hanno Käß <sup>3</sup>, Sabrina Ehnert <sup>1</sup> and Andreas K. Nussler <sup>1</sup>

**Table S1.** Concentrations of cryogel components which were tested during the development of the scaffolds.

| Scaffold Component | Final Concentration Within the Cryogel            |
|--------------------|---------------------------------------------------|
| ddH <sub>2</sub> O | adapted to the other scaffold components          |
| 2-HEMA 98%         | 1%–30%                                            |
| BAA 2%             | ratio 1:1 – 1:6 adapted to the HEMA concentration |
| Gelatin (300 g/L)  | 0%–40%                                            |
| BSA (100 g/L)      | 0%–60%                                            |
| Collagen (3.5 g/L) | 0%–40%                                            |
| TEMED              | 2%                                                |
| APS 10%            | 0.2%                                              |
| Glutaraldehyde 25% | 0%–2.5%                                           |

## Measurement of the Scaffold Permeability

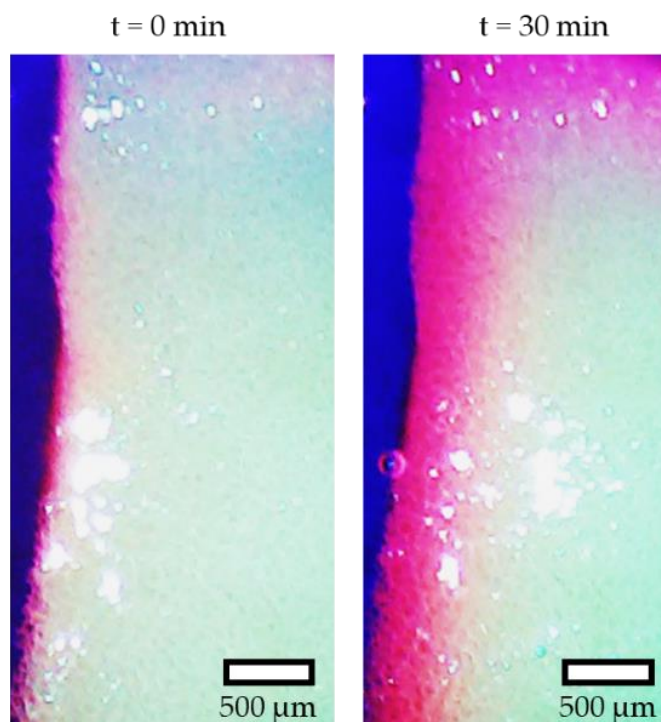

**Figure S1.** The diffusion rate of the red-colored SRB solution into the scaffold was used to determinate the permeability of the scaffolds. The figure shows representative images of the cross-section of the healthy liver scaffold. These images were used for the analysis of the scaffold permeability.
